# Supplementary material for: Sex differences in macronutrient intake and adherence to dietary recommendations: findings from the UK Biobank
Source: PubMed Central journal article supplement — BMJ Open. 2018 Apr 24;8(4):e020017. doi: 10.1136/bmjopen-2017-020017 (PMC5922487; doi:10.1136/bmjopen-2017-020017), 2018-04-24
Supplement: bmjopen-2017-020017supp001.pdf [file bmjopen-2017-020017supp001.pdf]

## Supplementary appendix

**eTable 1 Energy and macronutrient intake by age and sex**

|                           | Age group                  |                            |                            |                            |                            |                            |
|---------------------------|----------------------------|----------------------------|----------------------------|----------------------------|----------------------------|----------------------------|
|                           | 40-44                      | 45-49                      | 50-54                      | 55-59                      | 60-64                      | 65-69                      |
| <b>N</b>                  |                            |                            |                            |                            |                            |                            |
| Women                     | 12728                      | 16617                      | 195772                     | 22665                      | 27490                      | 15807                      |
| Men                       | 9723                       | 11736                      | 13765                      | 17322                      | 23752                      | 17264                      |
| <b>Energy Intake</b>      |                            |                            |                            |                            |                            |                            |
| Women                     | 8293.5 (2367.6)            | 8220.8 (2298.2)            | 8138.6 (2223.8)            | 8069.1 (2157.4)            | 8153.0 (2156.3)            | 8216.0 (2212.4)            |
| Men                       | 9848.1 (2931.7)            | 9697.8 (2825.8)            | 9544.8 (2720.5)            | 9471.0 (2621.5)            | 9446.4 (2534.3)            | 9372.6 (2530.9)            |
| <i>Mean difference</i>    | -1554.6 (-1623.8, -1485.3) | -1477.0 (-1536.7, -1417.1) | -1406.2 (-1459.2, -1353.1) | -1401.9 (-1448.8, -1355.1) | -1293.4 (-1334.0, -1252.7) | -1156.6 (-1208.0, -1105.1) |
| <b>Total Fat</b>          |                            |                            |                            |                            |                            |                            |
| Women                     | 75.0 (28.8)                | 73.9 (28.0)                | 72.4 (27.2)                | 71.4 (26.3)                | 71.9 (26.3)                | 72.5 (26.4)                |
| Men                       | 87.4 (34.6)                | 85.8 (33.6)                | 83.7 (32.4)                | 82.8 (31.3)                | 82.2 (30.4)                | 81.1 (29.9)                |
| <i>Mean difference</i>    | -12.4 (-13.2, -11.5)       | -11.9 (-12.6, -11.1)       | -11.3 (-12.0, -10.7)       | -11.4 (-11.9, -10.7)       | -10.3 (-10.7, -9.7)        | -8.6 (-9.2, -8.0)          |
| <b>Saturated Fat</b>      |                            |                            |                            |                            |                            |                            |
| Women                     | 28.4 (11.9)                | 28.2 (11.8)                | 27.6 (11.5)                | 27.2 (11.3)                | 27.6 (11.3)                | 28.1 (11.6)                |
| Men                       | 33.6 (14.7)                | 33.0 (14.3)                | 32.1 (13.7)                | 31.9 (13.5)                | 31.8 (13.2)                | 31.7 (13.2)                |
| <i>Mean difference</i>    | -5.2 (-5.5, -4.8)          | -4.8 (-5.1, -4.5)          | -4.5 (-4.8, -4.2)          | -4.7 (-4.9, -4.4)          | -4.2 (-4.4, -4.0)          | -3.6 (-3.8, -3.3)          |
| <b>PUFA</b>               |                            |                            |                            |                            |                            |                            |
| Women                     | 14.1 (7.2)                 | 13.8 (7.0)                 | 13.5 (6.8)                 | 13.4 (6.5)                 | 13.4 (6.6)                 | 13.3 (6.6)                 |
| Men                       | 16.0 (8.2)                 | 15.7 (8.0)                 | 15.4 (7.8)                 | 15.1 (7.5)                 | 15.0 (7.4)                 | 14.7 (7.3)                 |
| <i>Mean difference</i>    | -1.9 (-2.1, -1.7)          | -1.9 (-2.1, -1.8)          | -1.9 (-2.0, -1.7)          | -1.7 (-1.9, -1.7)          | -1.6 (-1.8, -1.5)          | -1.4 (-1.6, -1.3)          |
| <b>Total carbohydrate</b> |                            |                            |                            |                            |                            |                            |
| Women                     | 240.6 (78.7)               | 237.0 (77.0)               | 236.1 (75.6)               | 234.2 (73.6)               | 238.4 (74.1)               | 243.0 (77.8)               |
| Men                       | 282.1 (94.5)               | 275.8 (92.5)               | 269.7 (88.5)               | 267.6 (86.2)               | 268.7 (83.5)               | 269.4 (85.1)               |
| <i>Mean difference</i>    | -41.5 (-43.8, -39.2)       | -38.8 (-40.8, -36.8)       | -33.6 (-35.3, -31.8)       | -33.4 (-35.0, -31.9)       | -30.3 (-31.7, -29.0)       | -26.4 (-28.2, -24.6)       |
| <b>Total sugar</b>        |                            |                            |                            |                            |                            |                            |
| Women                     | 111.3 (46.2)               | 111.8 (46.2)               | 114.0 (45.9)               | 114.5 (44.6)               | 118.2 (45.3)               | 121.8 (48.4)               |
| Men                       | 127.8 (55.8)               | 125.2 (54.1)               | 123.1 (51.4)               | 123.4 (50.2)               | 125.7 (49.2)               | 127.4 (50.5)               |
| <i>Mean difference</i>    | -16.5 (-17.9, -15.2)       | -13.4 (-14.6, -12.2)       | -9.1 (-10.2, -8.1)         | -8.9 (-9.8, -7.9)          | -7.5 (-8.3, -6.7)          | -5.6 (-6.7, -4.5)          |
| <b>Fibre</b>              |                            |                            |                            |                            |                            |                            |
| Women                     | 15.4 (6.5)                 | 15.4 (6.2)                 | 15.9 (6.3)                 | 16.1 (6.2)                 | 16.6 (6.3)                 | 16.9 (6.5)                 |
| Men                       | 16.1 (7.0)                 | 16.0 (6.8)                 | 16.2 (6.9)                 | 16.6 (6.7)                 | 17.0 (6.7)                 | 17.3 (6.8)                 |
| <i>Mean difference</i>    | -0.7 (-0.8, -0.5)          | -0.6 (-0.7, -0.4)          | -0.3 (-0.5, -0.2)          | -0.5 (-0.5, -0.3)          | -0.4 (-0.5, -0.3)          | -0.4 (-0.5, -0.2)          |
| <b>Protein</b>            |                            |                            |                            |                            |                            |                            |
| Women                     | 77.9 (24.6)                | 77.8 (23.7)                | 77.5 (22.9)                | 77.4 (22.1)                | 78.5 (22.0)                | 78.6 (22.1)                |
| Men                       | 89.9 (30.4)                | 88.5(29.2)                 | 87.0 (27.6)                | 86.2 (26.1)                | 86.0 (25.0)                | 85.7 (24.9)                |
| <i>Mean difference</i>    | -12.0 (-12.7, -11.2)       | -10.7 (-11.3, -10.1)       | -9.5 (-10.1, -9.0)         | -8.8 (-9.2, -8.3)          | -7.5 (-7.9, -7.1)          | -7.1 (-7.6, -6.6)          |

Data are mean kJ for energy and grams for macronutrients (standard deviation) for continuous variables in women and men. Mean difference is the women minus men difference (95% confidence interval).

**eTable 2 Energy and macronutrient intake by socioeconomic status and sex**

|                            | Most Deprived              | SES 2                      | SES 3                     | SES 4                      | Least Deprived             |
|----------------------------|----------------------------|----------------------------|---------------------------|----------------------------|----------------------------|
| <b>N</b>                   |                            |                            |                           |                            |                            |
| Women                      | 40367                      | 28387                      | 21267                     | 15873                      | 9046                       |
| Men                        | 34142                      | 22922                      | 16527                     | 12219                      | 7627                       |
| <b>Energy Intake</b>       |                            |                            |                           |                            |                            |
| Women                      | 8177.3 (2134.6)            | 8168.1 (2167.3)            | 8200.7 (2248.6)           | 8164.2 (2349.7)            | 8055.7 (2456.5)            |
| Men                        | 9501.6 (2551.2)            | 9533.9 (2608.6)            | 9561.9 (2668.2)           | 9575.8 (2816.5)            | 9449.0 (3019.0)            |
| <i>Mean difference</i>     | -1324.3 (-1357.9, -1290.6) | -1365.8 (-1407.1, -1324.4) | -1361.2 (1410.8, -1311.5) | -1411.6 (-1472.1, -1351.2) | -1393.3 (-1476.4, -1310.1) |
| <b>Total Fat</b>           |                            |                            |                           |                            |                            |
| Women                      | 72.3 (26.2)                | 72.5 (26.4)                | 73.1 (27.1)               | 73.1 (28.4)                | 72.4 (29.4)                |
| Men                        | 83.0 (30.5)                | 83.3 (31.3)                | 83.9 (31.8)               | 83.8 (33.1)                | 82.7 (35.1)                |
| <i>Mean difference</i>     | -10.7 (-11.1, -10.2)       | -10.8 (-11.3, -10.3)       | -10.8 (-11.4, -10.2)      | -10.7 (-11.5, -10.0)       | -10.3 (-11.4, -9.4)        |
| <b>Saturated Fat</b>       |                            |                            |                           |                            |                            |
| Women                      | 27.7 (11.2)                | 27.8 (11.3)                | 27.9 (11.5)               | 27.9 (12.0)                | 27.7 (12.5)                |
| Men                        | 32.1 (13.2)                | 32.2 (13.4)                | 32.4 (13.8)               | 32.2 (14.2)                | 31.9 (15.2)                |
| <i>Mean difference</i>     | -4.4 (-4.6, -4.2)          | -4.4 (-4.7, -4.2)          | -4.5 (-4.8, -4.3)         | -4.3 (-4.6, -4.0)          | -4.2 (-4.6, -3.8)          |
| <b>Polyunsaturated Fat</b> |                            |                            |                           |                            |                            |
| Women                      | 13.5 (6.6)                 | 13.5 (6.6)                 | 13.6 (6.8)                | 13.5 (6.9)                 | 13.3 (7.2)                 |
| Men                        | 15.2 (7.4)                 | 15.2 (7.6)                 | 15.2 (7.5)                | 15.4 (8.0)                 | 15.0 (8.1)                 |
| <i>Mean difference</i>     | -1.7 (-1.8, -1.6)          | -1.7 (-1.8, -1.6)          | -1.6 (-1.7, -1.5)         | -1.9 (-2.1, -1.7)          | -1.7 (-1.9, -1.4)          |
| <b>Total carbohydrate</b>  |                            |                            |                           |                            |                            |
| Women                      | 238.2 (72.6)               | 238.1 (73.9)               | 238.3 (77.1)              | 237.5 (79.8)               | 235.5 (84.2)               |
| Men                        | 270.6 (83.8)               | 271.6 (85.3)               | 271.1 (88.2)              | 272.0 (92.2)               | 270.3 (99.9)               |
| <i>Mean difference</i>     | -32.4 (-33.6, -31.3)       | -33.5 (34.9, -32.1)        | -32.8 (-34.5, -31.1)      | -34.5 (-36.6, -32.5)       | -34.8 (-37.6, -32.0)       |
| <b>Total sugar</b>         |                            |                            |                           |                            |                            |
| Women                      | 116.7 (44.5)               | 115.8 (44.8)               | 115.0 (46.4)              | 114.2 (47.9)               | 113.2 (51.7)               |
| Men                        | 125.2 (49.0)               | 125.5 (49.7)               | 124.8 (51.4)              | 125.6 (54.5)               | 126.5 (60.2)               |
| <i>Mean difference</i>     | -8.5 (-9.2, -7.9)          | -9.7 (-10.5, -8.8)         | -9.8 (-10.8, -8.8)        | -11.4 (-12.6, -10.7)       | -13.3 (-15.0, -11.6)       |
| <b>Fibre</b>               |                            |                            |                           |                            |                            |
| Women                      | 16.3 (6.1)                 | 16.2 (6.2)                 | 16.2 (6.5)                | 15.9 (6.6)                 | 15.5 (6.9)                 |
| Men                        | 16.8 (6.5)                 | 16.7 (6.7)                 | 16.5 (6.8)                | 16.6 (7.2)                 | 16.0 (7.7)                 |
| <i>Mean difference</i>     | -0.5 (-0.6, -0.4)          | -0.5 (-0.7, -0.5)          | -0.3 (-0.4, -0.2)         | -0.7 (-0.8, -0.5)          | -0.5 (-0.7, -0.3)          |
| <b>Protein</b>             |                            |                            |                           |                            |                            |
| Women                      | 78.7 (21.7)                | 78.1 (22.0)                | 77.9 (23.1)               | 77.1 (24.4)                | 75.8 (25.4)                |
| Men                        | 86.9 (25.2)                | 87.0 (25.9)                | 86.8 (27.1)               | 87.0 (29.0)                | 86.1 (31.2)                |
| <i>Mean difference</i>     | -8.2 (-8.5, -7.8)          | -8.9 (-9.3, -8.4)          | -8.9 (-9.4, -8.4)         | -9.9 (-10.5, -9.2)         | -10.3 (-11.2, -9.5)        |

Data are mean kJ for energy and grams for macronutrients (standard deviation) for continuous variables in women and men. Mean difference is the women minus men difference (95% confidence interval).

eTable 3: Energy and macronutrient intake by body mass index and sex

|                            | BMI group                             |                                            |                                         |                                |
|----------------------------|---------------------------------------|--------------------------------------------|-----------------------------------------|--------------------------------|
|                            | Underweight (<18.5kg/m <sup>2</sup> ) | Normal Weight (18.5- 25kg/m <sup>2</sup> ) | Overweight (25 – 30 kg/m <sup>2</sup> ) | Obese (>30 kg/m <sup>2</sup> ) |
| <b>N</b>                   |                                       |                                            |                                         |                                |
| Women                      | 939                                   | 50300                                      | 40333                                   | 23218                          |
| Men                        | 195                                   | 26248                                      | 46050                                   | 20768                          |
| <b>Energy Intake</b>       |                                       |                                            |                                         |                                |
| Women                      | 8231.7 (72.9)                         | 8199.1 (9.6)                               | 8112.3 (11.0)                           | 8202.6 (15.7)                  |
| Men                        | 9707.9 (196.4)                        | 9643.8 (15.7)                              | 9495.0 (12.3)                           | 9452.1 (19.8)                  |
| Mean difference            | -1476.2 (-1836.1, -1116.4)            | -1444.7 (-1478.8, -1410.5)                 | -1382.7 (-1415.4, -1349.9)              | -1249.5 (-1298.5, -1200.5)     |
| <b>Total Fat</b>           |                                       |                                            |                                         |                                |
| Women                      | 74.5 (0.9)                            | 72.7 (0.1)                                 | 71.8 (0.1)                              | 74.0 (0.2)                     |
| Men                        | 87.5 (2.5)                            | 84.2 (0.2)                                 | 82.7 (0.1)                              | 83.6 (0.2)                     |
| Mean difference            | -13.0 (-17.5, -8.4)                   | -11.5 (-11.9, -11.1)                       | -10.9 (-11.3, -10.6)                    | -9.6 (-10.2, -9.0)             |
| <b>Saturated Fat</b>       |                                       |                                            |                                         |                                |
| Women                      | 28.6 (0.4)                            | 27.6 (0.1)                                 | 27.5 (0.1)                              | 28.6 (0.1)                     |
| Men                        | 34.1 (1.1)                            | 32.3 (0.1)                                 | 31.9 (0.1)                              | 32.6 (0.1)                     |
| Mean difference            | -5.5 (-7.6, -3.5)                     | -4.7 (-4.9, -4.5)                          | -4.4 (-4.6, -4.3)                       | -4.0 (-4.2, -3.7)              |
| <b>Polyunsaturated Fat</b> |                                       |                                            |                                         |                                |
| Women                      | 13.8 (0.2)                            | 13.5 (0.03)                                | 13.4 (0.03)                             | 13.7 (0.05)                    |
| Men                        | 16.0 (0.6)                            | 15.5 (0.05)                                | 15.1 (0.04)                             | 15.1 (0.05)                    |
| Mean difference            | -2.2 (-3.2, -1.1)                     | -2.0 (-2.1 -1.8)                           | -1.7 (-1.8 -1.6)                        | -1.4 (-1.6, -1.3)              |
| <b>Total carbohydrate</b>  |                                       |                                            |                                         |                                |
| Women                      | 246.0 (2.5)                           | 239.9 (0.3)                                | 235.4 (0.4)                             | 237.5 (0.5)                    |
| Men                        | 286.3 (6.6)                           | 281.5 (0.5)                                | 269.1 (0.4)                             | 262.3 (0.6)                    |
| Mean difference            | -40.3 (-52.5, -28.0)                  | -41.6 (-42.7, -40.4)                       | -33.7 (-34.8, -32.6)                    | -24.8 (-26.4, -23.2)           |
| <b>Total sugar</b>         |                                       |                                            |                                         |                                |
| Women                      | 119.2 (1.6)                           | 117.2 (0.2)                                | 114.6 (0.2)                             | 113.6 (0.3)                    |
| Men                        | 133.5 (3.8)                           | 130.3 (0.3)                                | 125.2 (0.2)                             | 119.5 (0.4)                    |
| Mean difference            | -14.3 (-22.0, -6.7)                   | -13.2 (-13.9 -12.5)                        | -10.6 (-11.2, -9.9)                     | -5.9 (-6.9, -5.0)              |
| <b>Fibre</b>               |                                       |                                            |                                         |                                |
| Women                      | 17.6 (0.2)                            | 16.4 (0.03)                                | 15.9 (0.03)                             | 15.6 (0.04)                    |
| Men                        | 17.3 (0.6)                            | 17.4 (0.04)                                | 16.5 (0.03)                             | 16.0 (0.05)                    |
| Mean difference            | 0.3 (-0.9, 1.3)                       | -1.0 (-1.15, 0.05)                         | -0.6 (-0.6, -0.4)                       | -0.4 (-0.8, 0.0)               |
| <b>Protein</b>             |                                       |                                            |                                         |                                |
| Women                      | 74.9 (0.7)                            | 76.6 (0.1)                                 | 78.2 (0.1)                              | 80.6 (0.2)                     |
| Men                        | 83.2 (1.8)                            | 86.0 (0.2)                                 | 86.6 (0.1)                              | 88.7 (0.2)                     |
| Mean difference            | -8.3 (-11.8, -4.7)                    | -9.4 (-9.7, -9.0)                          | -8.4 (-8.7, -8.04)                      | -8.0 (-8.6, -7.5)              |

Data are mean kJ for energy and grams for macronutrients (standard deviation) for continuous variables in women and men. Mean difference is the women minus men difference (95% confidence interval).

**eTable 4: Non-adherence (%) to dietary recommendations by age and sex**

|                           | Age group         |                   |                   |                   |                   |                   |
|---------------------------|-------------------|-------------------|-------------------|-------------------|-------------------|-------------------|
|                           | 40-44             | 45-49             | 50-54             | 55-59             | 60-64             | 65-69             |
| <b>N</b>                  |                   |                   |                   |                   |                   |                   |
| Women                     | 12728             | 16617             | 19772             | 22665             | 27490             | 15807             |
| Men                       | 9723              | 11736             | 13765             | 17322             | 23752             | 17264             |
| <b>Energy Intake</b>      |                   |                   |                   |                   |                   |                   |
| Women                     | 45.4 (49.8)       | 43.4 (49.6)       | 41.9 (49.3)       | 40.3 (49.0)       | 42.1 (49.4)       | 42.8 (49.5)       |
| Men                       | 37.3 (45.4)       | 34.8 (43.4)       | 32.7 (41.9)       | 31.1 (46.3)       | 30.3 (45.9)       | 29.2 (45.5)       |
| Mean difference           | 8.1 (6.8, 9.4)    | 8.6 (7.4, 9.7)    | 9.2 (8.1, 10.2)   | 9.2 (8.2, 10.1)   | 11.8 (11.0, 12.7) | 13.6 (12.6, 14.7) |
| <b>Total Fat</b>          |                   |                   |                   |                   |                   |                   |
| Women                     | 38.5 (48.7)       | 37.7 (48.5)       | 35.2 (47.8)       | 33.9 (47.3)       | 33.4 (47.2)       | 33.6 (47.2)       |
| Men                       | 35.4 (47.8)       | 34.8 (47.6)       | 33.1 (47.0)       | 31.5 (46.5)       | 31.0 (46.3)       | 29.4 (45.5)       |
| Mean difference           | 3.1 (1.9, 4.4)    | 2.9 (1.8, 4.0)    | 2.1 (1.1, 3.1)    | 2.4 (1.4, 3.3)    | 2.4 (1.6, 3.2)    | 4.2 (3.2, 5.2)    |
| <b>Saturated Fat</b>      |                   |                   |                   |                   |                   |                   |
| Women                     | 67.4 (46.9)       | 67.0 (47.0)       | 66.0 (47.4)       | 65.1 (47.7)       | 65.2 (47.6)       | 66.4 (47.2)       |
| Men                       | 66.3 (47.3)       | 65.7 (47.5)       | 64.2 (47.9)       | 64.4 (47.9)       | 64.2 (47.9)       | 64.9 (47.7)       |
| Mean difference           | 1.1 (-0.1, 2.4)   | 1.3 (0.1, 2.4)    | 1.8 (0.7, 2.7)    | 0.7 (-0.2, 1.6)   | 1.0 (0.1, 1.8)    | 1.5 (0.5, 2.6)    |
| <b>PUFA</b>               |                   |                   |                   |                   |                   |                   |
| Women                     | 54.7 (49.8)       | 55.7 (49.7)       | 57.2 (49.5)       | 56.4 (49.6)       | 57.2 (49.5)       | 59.2 (49.1)       |
| Men                       | 57.3 (49.5)       | 58.2 (49.3)       | 59.0 (49.2)       | 59.6 (49.1)       | 59.8 (49.0)       | 61.7 (48.6)       |
| Mean difference           | -2.6 (-3.9, -1.2) | -2.5 (-2.6, -1.2) | -1.8 (-2.9, -0.7) | -3.2 (-4.1, -2.2) | -2.6 (-3.5, -1.8) | -2.5 (-3.5, -1.4) |
| <b>Total carbohydrate</b> |                   |                   |                   |                   |                   |                   |
| Women                     | 51.3 (50.0)       | 53.5 (49.9)       | 51.7 (50.0)       | 51.9 (50.0)       | 50.3 (50.0)       | 48.1 (50.0)       |
| Men                       | 54.4 (49.8)       | 55.9 (49.6)       | 57.7 (49.4)       | 57.9 (49.4)       | 56.5 (49.6)       | 53.9 (49.8)       |
| Mean difference           | -3.1 (-4.4, -1.7) | -2.4 (-3.6, -1.3) | -6.0 (-7.1, -4.9) | -6.0 (-7.0, -5.0) | -6.2 (-7.1, -5.4) | -5.8 (-6.9, -4.7) |
| <b>Total sugar</b>        |                   |                   |                   |                   |                   |                   |
| Women                     | 65.8 (47.4)       | 66.1 (47.3)       | 68.5 (46.5)       | 69.7 (46.0)       | 72.6 (44.6)       | 74.3 (43.7)       |
| Men                       | 50.2 (50.0)       | 48.2 (50.0)       | 47.6 (49.9)       | 47.8 (50.0)       | 49.9 (50.0)       | 51.3 (50.0)       |
| Mean difference           | 15.6 (14.3, 16.9) | 17.9 (16.8, 19.1) | 20.9 (19.9, 22.0) | 21.9 (21.0, 22.9) | 22.7 (21.8, 23.5) | 23.0 (21.9, 24.0) |
| <b>Fibre</b>              |                   |                   |                   |                   |                   |                   |
| Women                     | 97.5 (15.5)       | 97.6 (15.3)       | 97.4 (15.9)       | 97.3 (16.1)       | 96.8 (17.5)       | 96.3 (18.9)       |
| Men                       | 96.1 (19.5)       | 96.6 (18.1)       | 96.4 (18.6)       | 96.5 (18.3)       | 96.0 (19.5)       | 95.5 (20.6)       |
| Mean difference           | 1.4 (1.0, 1.9)    | 1.0 (0.6, 1.4)    | 1.0 (0.6, 1.4)    | 0.8 (0.5, 1.2)    | 0.8 (0.5, 1.1)    | 0.8 (0.3, 1.2)    |
| <b>Protein</b>            |                   |                   |                   |                   |                   |                   |
| Women                     | 15.4 (36.1)       | 14.7 (35.4)       | 14.5 (35.2)       | 14.0 (34.7)       | 12.2 (32.7)       | 12.0 (32.5)       |
| Men                       | 19.2 (39.4)       | 19.8 (39.9)       | 20.7 (40.5)       | 20.2 (40.1)       | 18.2 (38.6)       | 17.0 (37.6)       |
| Mean difference           | -3.8 (-4.7, -2.8) | -5.1 (-6.0, -4.2) | -6.2 (-7.0, -5.4) | -6.2 (-6.9, -5.5) | -6.0 (-6.6, -5.4) | -5.0 (-5.8, -4.3) |

Data are percentage non-adherence (standard deviation) and women minus men mean difference (95% confidence interval).

eTable 5: Odds ratio (women versus men) and 95% confidence intervals for non-adherence to macronutrient intake recommendations, by age

|                            | Age group         |                   |                   |                   |                   |                   | P-value for interaction |
|----------------------------|-------------------|-------------------|-------------------|-------------------|-------------------|-------------------|-------------------------|
|                            | 40-44             | 45-49             | 50-54             | 55-59             | 60-64             | 65-69             |                         |
| <b>N</b>                   |                   |                   |                   |                   |                   |                   |                         |
| Women                      | 12728             | 16617             | 19772             | 22665             | 27490             | 15807             |                         |
| Men                        | 9723              | 11736             | 13765             | 17322             | 23752             | 17264             |                         |
| <b>Total Fat</b>           | 1.15 (1.06, 1.20) | 1.14 (1.08, 1.19) | 1.10 (1.05, 1.15) | 1.11 (1.06, 1.16) | 1.11 (1.08, 1.16) | 1.22 (1.16, 1.28) | 0.343                   |
| <b>Saturated Fat</b>       | 1.05 (0.99, 1.11) | 1.05 (1.01, 1.11) | 1.08 (1.03, 1.14) | 1.03 (0.99, 1.08) | 1.04 (1.01, 1.08) | 1.08 (1.02, 1.12) | 0.898                   |
| <b>Polyunsaturated Fat</b> | 0.90 (0.85, 0.95) | 0.91 (0.86, 0.95) | 0.93 (0.89, 0.97) | 0.88 (0.85, 0.92) | 0.89 (0.86, 0.93) | 0.90 (0.86, 0.94) | 0.649                   |
| <b>Total carbohydrate</b>  | 0.88 (0.84, 0.93) | 0.91 (0.86, 0.95) | 0.79 (0.75, 0.82) | 0.78 (0.75, 0.81) | 0.78 (0.75, 0.81) | 0.79 (0.76, 0.83) | <0.001                  |
| <b>Total sugar</b>         | 1.92 (1.82, 2.00) | 2.08 (2.00, 2.22) | 2.38 (2.27, 2.50) | 2.50 (2.44, 2.63) | 2.63 (2.56, 2.78) | 2.70 (2.63, 2.86) | <0.001                  |
| <b>Fibre</b>               | 1.61 (1.39, 1.89) | 1.43 (1.25, 1.64) | 1.41 (1.23, 1.59) | 1.32 (1.18, 1.47) | 1.27 (1.15, 1.39) | 1.20 (1.09, 1.35) | 0.037                   |
| <b>Protein</b>             | 0.77 (0.71, 0.83) | 0.70 (0.66, 0.74) | 0.65 (0.61, 0.69) | 0.64 (0.61, 0.68) | 0.63 (0.60, 0.66) | 0.66 (0.63, 0.71) | 0.072                   |

Odds ratios were adjusted for Townsend deprivation index and ethnicity

**eTable 6: Non-adherence (%) to dietary recommendations by socioeconomic status and sex**

|                            | Most Deprived     | SES 2             | SES 3             | SES 4             | Least Deprived    |
|----------------------------|-------------------|-------------------|-------------------|-------------------|-------------------|
| <b>N</b>                   |                   |                   |                   |                   |                   |
| Women                      | 40367             | 28387             | 21267             | 15873             | 9046              |
| Men                        | 34142             | 22922             | 16527             | 12219             | 7627              |
| <b>Energy Intake</b>       |                   |                   |                   |                   |                   |
| Women                      | 42.5 (49.4)       | 42.5 (49.4)       | 42.9 (49.5)       | 42.1 (49.4)       | 40.3 (49.0)       |
| Men                        | 31.2 (46.3)       | 31.5 (46.4)       | 32.7 (46.9)       | 33.3 (47.1)       | 32.3 (46.8)       |
| Mean difference            | 11.3 (10.6, 12.0) | 11.0 (10.2, 11.8) | 10.2 (9.3, 11.2)  | 8.8 (7.7, 10.0)   | 8.0 (6.5, 9.5)    |
| <b>Total Fat</b>           |                   |                   |                   |                   |                   |
| Women                      | 33.8 (47.3)       | 34.4 (47.5)       | 36.0 (48.0)       | 36.1 (48.0)       | 38.0 (48.5)       |
| Men                        | 31.1 (46.3)       | 32.0 (46.7)       | 32.5 (46.8)       | 33.0 (47.0)       | 33.9 (47.3)       |
| Mean difference            | 2.7 (2.1, 3.4)    | 2.4 (1.6, 3.2)    | 3.5 (2.5, 4.5)    | 3.1 (2.0, 4.3)    | 4.1 (2.6, 5.6)    |
| <b>Saturated Fat</b>       |                   |                   |                   |                   |                   |
| Women                      | 65.8 (47.4)       | 66.0 (47.4)       | 66.2 (47.3)       | 66.1 (47.3)       | 66.1 (47.3)       |
| Men                        | 65.0 (47.7)       | 65.1 (47.7)       | 65.2 (47.6)       | 63.9 (48.0)       | 63.0 (48.3)       |
| Mean difference            | 0.8 (0.1, 1.4)    | 0.9 (0.1, 1.7)    | 1.0 (0.3, 2.0)    | 2.2 (1.1, 3.3)    | 3.1 (1.7, 4.6)    |
| <b>Polyunsaturated Fat</b> |                   |                   |                   |                   |                   |
| Women                      | 56.5 (49.6)       | 56.3 (49.6)       | 56.7 (49.6)       | 57.6 (49.4)       | 59.1 (49.2)       |
| Men                        | 58.9 (49.2)       | 59.5 (49.1)       | 59.9 (49.0)       | 60.1 (49.0)       | 60.7 (48.8)       |
| Mean difference            | -2.4 (-3.1, -1.7) | -3.2 (-4.2, -2.4) | -3.2 (-4.2, -2.2) | -2.5 (-3.6, -1.3) | -1.6 (-3.1, -0.1) |
| <b>Total carbohydrate</b>  |                   |                   |                   |                   |                   |
| Women                      | 51.2 (50.0)       | 50.7 (50.0)       | 51.7 (50.0)       | 51.3 (50.0)       | 50.2 (50.0)       |
| Men                        | 56.2 (49.6)       | 56.2 (49.6)       | 56.7 (49.5)       | 56.4 (49.6)       | 54.6 (49.8)       |
| Mean difference            | -5.0 (-5.7, -4.3) | -5.5 (-6.4, -4.6) | -5.0 (-6.0, -4.0) | -5.1 (-6.3, -3.9) | -4.4 (-5.9, -2.9) |
| <b>Total sugar</b>         |                   |                   |                   |                   |                   |
| Women                      | 71.5 (45.2)       | 70.9 (45.4)       | 69.2 (46.2)       | 67.7 (46.8)       | 64.7 (47.8)       |
| Men                        | 49.8 (50.0)       | 49.6 (50.0)       | 48.5 (50.0)       | 48.8 (50.0)       | 48.2 (50.0)       |
| Mean difference            | 21.7 (21.0, 22.3) | 21.3 (20.5, 22.2) | 20.7 (19.7, 21.6) | 18.9 (17.8, 20.1) | 16.5 (15.0, 17.9) |
| <b>Fibre</b>               |                   |                   |                   |                   |                   |
| Women                      | 97.3 (16.2)       | 97.4 (16.0)       | 97.0 (17.2)       | 96.9 (17.4)       | 96.6 (18.0)       |
| Men                        | 96.6 (18.2)       | 96.2 (19.2)       | 96.2 (19.0)       | 95.5 (20.7)       | 95.1 (21.5)       |
| Mean difference            | 0.7 (0.5, 1.0)    | 1.2 (0.9, 1.5)    | 0.8 (0.4, 1.1)    | 1.4 (0.9, 1.8)    | 1.5 (0.9, 2.1)    |
| <b>Protein</b>             |                   |                   |                   |                   |                   |
| Women                      | 11.4 (31.8)       | 12.7 (33.2)       | 14.0 (34.7)       | 16.9 (37.5)       | 20.1 (40.1)       |
| Men                        | 17.2 (37.8)       | 18.5 (38.8)       | 19.5 (39.6)       | 21.2 (40.9)       | 24.1 (42.8)       |
| Mean difference            | -5.8 (-6.3, -5.3) | -5.8 (-6.5, -5.2) | -5.5 (-6.3, -4.8) | -4.3 (-5.2, -3.3) | -4.0 (-5.2, -2.7) |

Data are percentage non-adherence (standard deviation) and women minus men mean difference (95% confidence interval).

**eTable 7: Odds ratio (women versus men) and 95% confidence intervals for non-adherence to macronutrient intake recommendations, by socioeconomic status**

|                            | Least Deprived    | SES 2             | SES<br>SES 3      | SES 4             | Most deprived     | P-value for interaction |
|----------------------------|-------------------|-------------------|-------------------|-------------------|-------------------|-------------------------|
| <b>N</b>                   |                   |                   |                   |                   |                   |                         |
| Women                      | 40367             | 28387             | 21267             | 15873             | 9046              |                         |
| Men                        | 34142             | 22922             | 16527             | 12219             | 7627              |                         |
| <b>Total Fat</b>           | 1.14 (1.10, 1.18) | 1.11 (1.08, 1.16) | 1.16 (1.12, 1.22) | 1.15 (1.10, 1.20) | 1.19 (1.12, 1.27) | 0.033                   |
| <b>Saturated Fat</b>       | 1.03 (1.01, 1.06) | 1.04 (1.01, 1.08) | 1.04 (1.01, 1.09) | 1.10 (1.05, 1.16) | 1.15 (1.08, 1.22) | <0.001                  |
| <b>Polyunsaturated Fat</b> | 0.91 (0.88, 0.93) | 0.88 (0.84, 0.90) | 0.88 (0.84, 0.92) | 0.90 (0.86, 0.95) | 0.93 (0.88, 0.99) | 0.857                   |
| <b>Total carbohydrate</b>  | 0.82 (0.79, 0.84) | 0.80 (0.78, 0.83) | 0.82 (0.79, 0.85) | 0.81 (0.78, 0.85) | 0.84 (0.79, 0.89) | 0.871                   |
| <b>Total sugar</b>         | 2.50 (2.44, 2.63) | 2.50 (2.38, 2.56) | 2.38 (2.27, 2.50) | 2.22 (2.08, 2.33) | 1.96 (1.85, 2.08) | <0.001                  |
| <b>Fibre</b>               | 1.28 (1.18, 1.39) | 1.47 (1.33, 1.61) | 1.25 (1.11, 1.39) | 1.45 (1.28, 1.64) | 1.47 (1.27, 1.72) | 0.013                   |
| <b>Protein</b>             | 0.62 (0.60, 0.65) | 0.64 (0.61, 0.67) | 0.67 (0.63, 0.70) | 0.76 (0.71, 0.80) | 0.79 (0.74, 0.85) | <0.001                  |

Odds ratios were adjusted for age and ethnicity



**eTable 8: Non-adherence (%) to dietary recommendations by BMI group and sex**

|                            | BMI Group                             |                                            |                                         |                                |
|----------------------------|---------------------------------------|--------------------------------------------|-----------------------------------------|--------------------------------|
|                            | Underweight (<18.5kg/m <sup>2</sup> ) | Normal Weight (18.5- 25kg/m <sup>2</sup> ) | Overweight (25 – 30 kg/m <sup>2</sup> ) | Obese (>30 kg/m <sup>2</sup> ) |
| <b>N</b>                   |                                       |                                            |                                         |                                |
| Women                      | 939                                   | 50300                                      | 40333                                   | 23218                          |
| Men                        | 195                                   | 26248                                      | 46050                                   | 20768                          |
| <b>Energy Intake</b>       |                                       |                                            |                                         |                                |
| Women                      | 44.5 (1.6)                            | 43.0 (0.2)                                 | 41.2 (0.2)                              | 42.9 (0.3)                     |
| Men                        | 31.8 (3.3)                            | 32.9 (0.3)                                 | 31.3 (0.2)                              | 31.9 (0.3)                     |
| Mean difference            | 12.7 (5.1, 2.0)                       | 10.1 (9.3, 10.8)                           | 9.9 (9.3, 10.6)                         | 11.0 (10.1, 11.9)              |
| <b>Total Fat</b>           |                                       |                                            |                                         |                                |
| Women                      | 39.8 (1.6)                            | 34.2 (0.2)                                 | 34.0 (0.2)                              | 38.3 (0.3)                     |
| Men                        | 42.1 (3.5)                            | 31.3 (0.3)                                 | 31.3 (0.2)                              | 34.6 (0.3)                     |
| Mean difference            | -2.3 (-9.7, 5.4)                      | 2.9 (2.2, 3.6)                             | 2.7 (2.1, 3.4)                          | 3.7 (2.7, 4.5)                 |
| <b>Saturated Fat</b>       |                                       |                                            |                                         |                                |
| Women                      | 66.8 (1.5)                            | 65.0 (0.2)                                 | 65.6 (0.2)                              | 68.8 (0.3)                     |
| Men                        | 64.1 (1.4)                            | 63.7 (0.3)                                 | 64.4 (0.2)                              | 67.0 (0.3)                     |
| Mean difference            | 2.7 (4.6, 10.0)                       | 1.3 (0.6, 2.0)                             | 1.2 (0.5, 1.8)                          | 1.8 (0.9, 2.6)                 |
| <b>Polyunsaturated Fat</b> |                                       |                                            |                                         |                                |
| Women                      | 54.7 (1.6)                            | 56.5 (0.02)                                | 57.2 (0.02)                             | 57.1 (0.03)                    |
| Men                        | 57.9 (3.5)                            | 59.0 (0.03)                                | 59.6 (0.02)                             | 60.0 (0.03)                    |
| Mean difference            | -3.2 (-10.9, 4.5)                     | -2.5 (-3.3 -1.8)                           | -2.4 (-3.1 -1.8)                        | -2.9 (-3.8, -1.9)              |
| <b>Total carbohydrate</b>  |                                       |                                            |                                         |                                |
| Women                      | 54.3 (0.2)                            | 49.9 (0.2)                                 | 48.2 (0.2)                              | 47.6 (0.3)                     |
| Men                        | 53.3 (0.4)                            | 49.7 (0.3)                                 | 42.8 (0.2)                              | 38.5 (0.6)                     |
| Mean difference            | 1.0 (-6.7, 8.7)                       | 0.2 (-0.5, 0.9)                            | 5.4 (-6.1, 4.7)                         | 9.1(8.2, 10.0)                 |
| <b>Total sugar</b>         |                                       |                                            |                                         |                                |
| Women                      | 72.0 (1.5)                            | 72.1 (0.2)                                 | 69.1 (0.2)                              | 66.5 (0.3)                     |
| Men                        | 56.4 (3.6)                            | 54.2 (0.3)                                 | 49.1 (0.2)                              | 43.3 (0.3)                     |
| Mean difference            | 15.6 (8.5, 22.6)                      | 17.9 (17.2, 18.6)                          | 20.0 (19.3, 20.6)                       | 23.2(22.2, 24.1)               |
| <b>Fibre</b>               |                                       |                                            |                                         |                                |
| Women                      | 94.2 (0.8)                            | 97.1 (0.1)                                 | 97.4 (0.01)                             | 97.0 (0.01)                    |
| Men                        | 92.3 (1.9)                            | 95.4 (0.1)                                 | 96.5 (0.01)                             | 96.5 (0.01)                    |
| Mean difference            | 1.9 (-1.8, 0.6)                       | 1.7 (1.4, 2.0)                             | 0.9 (0.7, 1.1)                          | 0.5 (0.1, 0.8)                 |
| <b>Protein</b>             |                                       |                                            |                                         |                                |
| Women                      | 2.4 (0.5)                             | 6.1 (0.1)                                  | 13.0 (0.2)                              | 30.6 (0.3)                     |
| Men                        | 3.6 (1.3)                             | 8.0 (0.2)                                  | 17.4 (0.2)                              | 35.7 (0.3)                     |
| Mean difference            | -1.2 (-3.6, 1.3)                      | -1.9 (-2.4, -1.6)                          | -4.4 (-4.8, -3.9)                       | -5.1 (-6.0, -4.3)              |

Data are percentage non-adherence (standard deviation) and women minus men mean difference (95% confidence interval).

**eTable 9: Odds ratio (women versus men) and 95% confidence intervals for non-adherence to macronutrient intake recommendations, by BMI group**

|                            | BMI Group                             |                                           |                                       |                                | P-value for interaction |
|----------------------------|---------------------------------------|-------------------------------------------|---------------------------------------|--------------------------------|-------------------------|
|                            | Underweight (<18.5kg/m <sup>2</sup> ) | Normal Weight (18.5-25kg/m <sup>2</sup> ) | Overweight (25–30 kg/m <sup>2</sup> ) | Obese (>30 kg/m <sup>2</sup> ) |                         |
| <b>N</b>                   |                                       |                                           |                                       |                                |                         |
| Women                      | 939                                   | 50300                                     | 40333                                 | 23218                          |                         |
| Men                        | 195                                   | 26248                                     | 46050                                 | 20768                          |                         |
| <b>Total Fat</b>           | 0.92 (0.67, 1.25)                     | 1.14 (1.11, 1.18)                         | 1.14 (1.10, 1.16)                     | 1.18 (1.12, 1.22)              | 0.789                   |
| <b>Saturated Fat</b>       | 1.12 (0.81, 1.56)                     | 1.06 (1.03, 1.10)                         | 1.05 (1.02, 1.09)                     | 1.09 (1.04, 1.12)              | 0.977                   |
| <b>Polyunsaturated Fat</b> | 0.88 (0.79, 1.20)                     | 0.90 (0.87, 0.93)                         | 0.90 (0.88, 0.93)                     | 0.88 (0.85, 0.93)              | 0.603                   |
| <b>Total carbohydrate</b>  | 0.96 (0.70, 1.31)                     | 0.99 (0.96, 1.02)                         | 0.81 (0.78, 0.83)                     | 0.69 (0.66, 0.71)              | 0.000                   |
| <b>Total sugar</b>         | 2.00 (1.45, 2.70)                     | 2.17 (2.13, 2.27)                         | 2.33 (2.27, 2.38)                     | 2.56 (2.50, 2.70)              | 0.000                   |
| <b>Fibre</b>               | 1.37 (0.76, 2.5)                      | 1.61 (1.49, 1.75)                         | 1.35 (1.25, 1.47)                     | 1.16 (1.04, 1.28)              | 0.000                   |
| <b>Protein</b>             | 0.68 (0.28, 1.59)                     | 0.74 (0.70, 0.78)                         | 0.71 (0.68, 0.74)                     | 0.79 (0.76, 0.83)              | 0.000                   |

Odds ratios were adjusted for age, socioeconomic status and ethnicity

**eTable 10: Energy and macronutrient intake standardised by body weight, by age and sex**

|                           | Age group         |                      |                      |                      |                      |                      |
|---------------------------|-------------------|----------------------|----------------------|----------------------|----------------------|----------------------|
|                           | 40-44             | 45-49                | 50-54                | 55-59                | 60-64                | 65-69                |
| <b>N</b>                  |                   |                      |                      |                      |                      |                      |
| Women                     | 12696             | 16586                | 19720                | 22618                | 27431                | 15769                |
| Men                       | 9699              | 11719                | 13726                | 17271                | 23686                | 17223                |
| <b>Energy Intake</b>      |                   |                      |                      |                      |                      |                      |
| Women                     | 121.5 (40.7)      | 120.2 (39.3)         | 118.3 (38.0)         | 117.5 (37.2)         | 118.8 (36.8)         | 120.5 (38.1)         |
| Men                       | 117.4 (38.8)      | 115.2 (37.5)         | 113.3 (36.8)         | 112.8 (35.7)         | 113.3 (34.4)         | 114.1 (34.4)         |
| <i>Mean difference</i>    | 4.1 (3.1, 5.2)    | 5.0 (4.1, 5.9)       | 4.9 (4.1, 5.7)       | 4.7 (3.9, 5.3)       | 5.5 (4.9, 6.1)       | 6.4 (5.7, 7.2)       |
| <b>Total Fat</b>          |                   |                      |                      |                      |                      |                      |
| Women                     | 1.10 (0.46)       | 1.08 (0.4)           | 1.05 (0.43)          | 1.04 (0.42)          | 1.05 (0.42)          | 1.06 (0.42)          |
| Men                       | 1.04 (0.44)       | 1.02 (0.4)           | 0.99 (0.41)          | 0.99 (0.40)          | 0.98 (0.39)          | 0.99 (0.38)          |
| <i>Mean difference</i>    | 0.06 (0.05, 0.07) | 0.06 (0.05, 0.07)    | 0.06 (0.05, 0.07)    | 0.05 (0.04, 0.06)    | 0.07 (0.05, 0.08)    | 0.07 (0.06, 0.09)    |
| <b>Saturated Fat</b>      |                   |                      |                      |                      |                      |                      |
| Women                     | 0.41 (0.19)       | 0.41 (0.19)          | 0.40 (0.18)          | 0.40 (0.18)          | 0.40 (0.17)          | 0.41 (0.18)          |
| Men                       | 0.40 (0.18)       | 0.39 (0.18)          | 0.38 (0.17)          | 0.38 (0.17)          | 0.38 (0.17)          | 0.38 (0.17)          |
| <i>Mean difference</i>    | 0.01 (0.01, 0.02) | 0.020 (0.016, 0.024) | 0.020 (0.016, 0.024) | 0.016 (0.013, 0.019) | 0.020 (0.017, 0.023) | 0.027 (0.023, 0.031) |
| <b>PUFA</b>               |                   |                      |                      |                      |                      |                      |
| Women                     | 0.21 (0.1)        | 0.20 (0.11)          | 0.20 (0.11)          | 0.19 (0.10)          | 0.19 (0.10)          | 0.20 (0.10)          |
| Men                       | 0.19 (0.1)        | 0.19 (0.10)          | 0.18 (0.10)          | 0.18 (0.09)          | 0.18 (0.09)          | 0.18 (0.09)          |
| <i>Mean difference</i>    | 0.2 (0.1, 0.3)    | 0.014 (0.012, 0.017) | 0.016 (0.011, 0.018) | 0.014 (0.012, 0.017) | 0.014 (0.012, 0.017) | 0.016 (0.014, 0.018) |
| <b>Total carbohydrate</b> |                   |                      |                      |                      |                      |                      |
| Women                     | 3.53 (1.33)       | 3.47 (1.29)          | 3.44 (1.27)          | 3.41 (1.24)          | 3.48 (1.24)          | 3.57 (1.30)          |
| Men                       | 3.37 (1.26)       | 3.29 (1.23)          | 3.21 (1.20)          | 3.20 (1.17)          | 3.23 (1.14)          | 3.29 (1.16)          |
| <i>Mean difference</i>    | 0.16 (0.13, 0.19) | 0.18 (0.16, 0.22)    | 0.23 (0.20, 0.35)    | 0.21 (0.19, 0.24)    | 0.25 (0.22, 0.27)    | 0.28 (0.25, 0.31)    |
| <b>Total sugar</b>        |                   |                      |                      |                      |                      |                      |
| Women                     | 1.63 (0.75)       | 1.64 (0.75)          | 1.66 (0.74)          | 1.67 (0.73)          | 1.73 (0.73)          | 1.79 (0.79)          |
| Men                       | 1.53 (0.71)       | 1.49 (0.70)          | 1.47 (0.67)          | 1.48 (0.66)          | 1.51 (0.65)          | 1.56 (0.67)          |
| <i>Mean difference</i>    | 0.10 (0.09, 0.13) | 0.15 (0.13, 0.17)    | 0.19 (0.18, 0.21)    | 0.19 (0.18, 0.21)    | 0.22 (0.20, 0.23)    | 0.23 (0.22, 0.25)    |
| <b>Fibre</b>              |                   |                      |                      |                      |                      |                      |
| Women                     | 0.23 (0.11)       | 0.23 (0.10)          | 0.23 (0.10)          | 0.24 (0.10)          | 0.24 (0.10)          | 0.25 (0.11)          |
| Men                       | 0.19 (0.09)       | 0.19 (0.09)          | 0.19 (0.09)          | 0.20 (0.08)          | 0.20 (0.09)          | 0.21 (0.09)          |
| <i>Mean difference</i>    | 0.04 (0.02, 0.05) | 0.036 (0.034, 0.038) | 0.038 (0.036, 0.040) | 0.04 (0.03, 0.05)    | 0.04 (0.03, 0.05)    | 0.04 (0.03, 0.05)    |
| <b>Protein</b>            |                   |                      |                      |                      |                      |                      |
| Women                     | 1.14 (0.40)       | 1.13 (0.39)          | 1.12 (0.37)          | 1.12 (0.36)          | 1.14 (0.36)          | 1.15 (0.37)          |
| Men                       | 1.07 (0.39)       | 1.05 (0.37)          | 1.03 (0.36)          | 1.02 (0.34)          | 1.03 (0.32)          | 1.04 (0.33)          |
| <i>Mean difference</i>    | 0.07 (0.06, 0.08) | 0.086 (0.077, 0.095) | 0.09 (0.08, 0.10)    | 0.10 (0.09, 0.11)    | 0.11 (0.10, 0.12)    | 0.11 (0.10, 0.12)    |

Data are mean kJ/kg for energy and grams/kg for macronutrients (standard deviation) for continuous variables in women and men. Mean difference is the women minus men difference (95% confidence interval).

eTable 11: Energy and macronutrient intake standardised by body weight, by socioeconomic status and sex

|                            | Most Deprived        | SES 2                | SES 3                | SES 4                | Least Deprived       |
|----------------------------|----------------------|----------------------|----------------------|----------------------|----------------------|
| <b>N</b>                   |                      |                      |                      |                      |                      |
| Women                      | 40294                | 28331                | 21267                | 15824                | 9014                 |
| Men                        | 34079                | 22870                | 16527                | 12181                | 7627                 |
| <b>Energy Intake</b>       |                      |                      |                      |                      |                      |
| Women                      | 120.5 (36.9)         | 119.4 (37.2)         | 119.5 (38.7)         | 117.7 (40.0)         | 114.7 (41.0)         |
| Men                        | 113.8 (34.1)         | 114.0 (35.2)         | 114.3 (35.9)         | 114.9 (38.4)         | 113.5 (41.3)         |
| Mean difference            | 6.7 (6.2, 7.2)       | 5.3 (4.7, 5.9)       | 5.2 (4.5, 6.0)       | 2.8 (2.0, 3.8)       | 1.23 (-0.02, 2.49)   |
| <b>Total Fat</b>           |                      |                      |                      |                      |                      |
| Women                      | 1.06 (0.42)          | 1.06 (0.42)          | 1.06 (0.43)          | 1.05 (0.45)          | 1.03 (0.46)          |
| Men                        | 0.99 (0.39)          | 1.00 (0.40)          | 1.00 (0.40)          | 1.00 (0.43)          | 0.99 (0.46)          |
| Mean difference            | 0.07 (0.06, 0.08)    | 0.06 (0.05, 0.07)    | 0.06 (0.05, 0.07)    | 0.05 (0.04, 0.06)    | 0.04 (0.02, 0.05)    |
| <b>Saturated Fat</b>       |                      |                      |                      |                      |                      |
| Women                      | 0.41 (0.18)          | 0.40 (0.18)          | 0.41 (0.18)          | 0.40 (0.19)          | 0.39 (0.19)          |
| Men                        | 0.38 (0.16)          | 0.38 (0.17)          | 0.39 (0.17)          | 0.38 (0.18)          | 0.38 (0.19)          |
| Mean difference            | 0.03 (0.02, 0.03)    | 0.020 (0.017, 0.023) | 0.019 (0.015, 0.023) | 0.016 (0.012, 0.021) | 0.011 (0.005, 0.017) |
| <b>Polyunsaturated Fat</b> |                      |                      |                      |                      |                      |
| Women                      | 0.20 (0.10)          | 0.20 (0.10)          | 0.20 (0.11)          | 0.19 (0.11)          | 0.19 (0.11)          |
| Men                        | 0.18 (0.09)          | 0.18 (0.10)          | 0.18 (0.09)          | 0.18 (0.10)          | 0.18 (0.10)          |
| Mean difference            | 0.017 (0.015, 0.018) | 0.015 (0.014, 0.017) | 0.016 (0.014, 0.019) | 0.010 (0.007, 0.012) | 0.010 (0.006, 0.013) |
| <b>Total carbohydrate</b>  |                      |                      |                      |                      |                      |
| Women                      | 3.51 (1.23)          | 3.48 (1.25)          | 3.48 (1.30)          | 3.43 (1.33)          | 3.35 (1.36)          |
| Men                        | 3.25 (1.13)          | 3.26 (1.16)          | 3.25 (1.19)          | 3.27 (1.26)          | 3.25 (1.35)          |
| Mean difference            | 0.26 (0.25, 0.28)    | 0.22 (0.20, 0.25)    | 0.23 (0.20, 0.25)    | 0.16 (0.14, 0.19)    | 0.10 (0.06, 0.14)    |
| <b>Total sugar</b>         |                      |                      |                      |                      |                      |
| Women                      | 1.72 (0.73)          | 1.70 (0.73)          | 1.68 (0.75)          | 1.65 (0.77)          | 1.61 (0.81)          |
| Men                        | 1.51 (0.64)          | 1.51 (0.65)          | 1.50 (0.67)          | 1.51 (0.72)          | 1.52 (0.78)          |
| Mean difference            | 0.22 (0.21, 0.23)    | 0.19 (0.18, 0.20)    | 0.18 (0.17, 0.20)    | 0.14 (0.12, 0.15)    | 0.09 (0.07, 0.12)    |
| <b>Fibre</b>               |                      |                      |                      |                      |                      |
| Women                      | 0.24 (0.10)          | 0.24 (0.10)          | 0.24 (0.11)          | 0.23 (0.11)          | 0.22 (0.11)          |
| Men                        | 0.20 (0.09)          | 0.20 (0.09)          | 0.20 (0.09)          | 0.20 (0.10)          | 0.19 (0.10)          |
| Mean difference            | 0.039 (0.038, 0.041) | 0.036 (0.034, 0.037) | 0.039 (0.037, 0.041) | 0.030 (0.028, 0.033) | 0.029 (0.026, 0.032) |
| <b>Protein</b>             |                      |                      |                      |                      |                      |
| Women                      | 1.16 (0.36)          | 1.14 (0.36)          | 1.13 (0.38)          | 1.11 (0.39)          | 1.07 (0.40)          |
| Men                        | 1.04 (0.32)          | 1.04 (0.35)          | 1.03 (0.35)          | 1.04 (0.39)          | 1.03 (0.41)          |
| Mean difference            | 0.118 (0.114, 0.123) | 0.10 (0.09, 0.11)    | 0.10 (0.09, 0.11)    | 0.07 (0.06, 0.08)    | 0.04 (0.03, 0.06)    |

Data are mean kJ/kg for energy and grams/kg for macronutrients (standard deviation) for continuous variables in women and men. Mean difference is the women minus men difference (95% confidence interval).
